# Supplementary material for: “Tossing a coin:” defining the excessive use of short-acting beta2-agonists in asthma—the views of general practitioners and asthma experts in primary and secondary care
Source: PubMed Central journal article supplement (PMC6052065; doi:10.1038/s41533-018-0096-4), 2018-07-18
Supplement: 41533_2018_96_MOESM1_ESM.pdf [file 41533_2018_96_MOESM1_ESM.pdf]

## Supplementary material

| <b>Topic guide for interviews</b>                      |                                                                                                                                                                                                           |
|--------------------------------------------------------|-----------------------------------------------------------------------------------------------------------------------------------------------------------------------------------------------------------|
| Identifying and managing high SABA use                 | How would you define excessive SABA use? Excluding pre-exercise use.<br>PROMPT: volume and duration, evidence e.g. National Review of Asthma Deaths, BTS/GINA guidelines, other research                  |
|                                                        | How do you identify patients prescribed high numbers of SABA inhalers?<br>PROMPT: methods: computerised/manual and context, task: consultation/repeat prescribing, workflow                               |
|                                                        | What happens if high SABA prescribing is identified?<br>PROMPT: type of action, challenges to action, who is involved                                                                                     |
|                                                        | Who is involved in identifying and managing high SABA use?<br>PROMPT: the role of reception, pharmacy, nurse, patient                                                                                     |
| Alerts to identify high SABA use                       | What are your thoughts on an alert to identify patients being prescribed excessive SABA?<br>PROMPT: current EMIS medicines management alert                                                               |
|                                                        | How do you/would you use this alert?<br>PROMPT: In what context, how do you respond                                                                                                                       |
|                                                        | How could an alert be improved?                                                                                                                                                                           |
| Additional questions for primary and secondary experts | What are your thoughts on recommendations for electronic surveillance of SABA prescribing in primary care practices?<br>PROMPT: National Review of Asthma Deaths, current EMIS medicines management alert |
|                                                        | How do you feel this could best be done?                                                                                                                                                                  |
|                                                        | What do you view as challenges to such a system? How could these challenges be overcome?                                                                                                                  |
|                                                        | Who should such a system involve?                                                                                                                                                                         |
|                                                        | How should the success of such a system be measured?                                                                                                                                                      |
